# Supplementary material
Source: Elsevier journal article supplement (https://www.sciencedirect.com/science/article/pii/S2530053921001978)
Supplement: mmc1 [file S2530053921001978:mmc1.pdf]

## BJORL-D-21-00235 – Material Suplementar

## Apêndice 1 Estratégias de busca

| <b>Bases de dados</b>                           |                                                                                                                                                                                                                                                                                                                     |
|-------------------------------------------------|---------------------------------------------------------------------------------------------------------------------------------------------------------------------------------------------------------------------------------------------------------------------------------------------------------------------|
| <b>MEDLINE (PubMed)</b>                         | “Otitis Media”[MeSH] OR otitis media OR aom OR ome AND “Milk Hypersensitivity” [Mesh] OR milk proteins OR (CMA OR CMPA) OR “milk allergy” OR “milk protein allergy” OR “cow* milk protein allergy” OR allergy AND (“infant formula*” OR “milk adverse effects” OR “Food Hypersensitivity” [MeSH] OR “food allergen” |
| <b>EMBASE (Elsevier)</b>                        | ‘otitis media’/exp AND ‘milk allergy’/exp                                                                                                                                                                                                                                                                           |
| <b>Web of Science (Clarivate Analytics)</b>     | ‘otitis media’ OR aom OR ome AND “milk hypersensitivity” OR milk proteins OR (CMA OR CMPA) OR “milk allergy” OR “milk protein allergy” OR “cow* milk protein allergy” OR allergy AND (“infant formula*” OR “milk adverse effects” OR “food hypersensitivity” OR “food allergen”.                                    |
| <b>LILACS (BIREME)</b>                          | MH: Otitis Media OR MH:C09.218.705.663\$ OR “otitis media” OR “Oтите Média” AND “Milk Hypersensitivity” OR “Hipersensibilidad a la Leche” OR “Hipersensibilidade ao Leite” OR “Food Hypersensitivity” OR “Hipersensibilidad a los Alimentos” OR “Hipersensibilidade Alimentar”                                      |
| <b>CENTRAL</b>                                  | #1 MeSH descriptor “Otitis Media” explode all trees                                                                                                                                                                                                                                                                 |
|                                                 | #2 otitis OR aom OR ome AND MeSH descriptor “Milk Hypersensitivity” explode all trees                                                                                                                                                                                                                               |
| <b>Literatura cinzenta</b>                      |                                                                                                                                                                                                                                                                                                                     |
| <b>Google Scholar</b>                           | “otitis media” AND “milk allergy” OR “milk hypersensitivity”                                                                                                                                                                                                                                                        |
| <b>OpenGrey</b>                                 | “otitis media” AND “milk allergy” OR “milk hypersensitivity”                                                                                                                                                                                                                                                        |
| <b>Turning Research Into Practice (TRIP)</b>    | “otitis media” AND “milk allergy” OR “milk hypersensitivity”                                                                                                                                                                                                                                                        |
| <b>Catálogo de teses e dissertações (CAPES)</b> | “otitis media” AND “milk allergy” OR “milk hypersensitivity” OR “alergia ao leite de vaca”                                                                                                                                                                                                                          |

## Apêndice 2 Requisição de artigo potencialmente elegível indisponível para acesso.

**From:** [REDACTED]  
**Date:** Monday, November 16, 2020 at 11:12 AM  
**To:** "[annallergy@umc.edu](mailto:annallergy@umc.edu)" <[annallergy@umc.edu](mailto:annallergy@umc.edu)>  
**Subject:** [EXTERNAL]Request article

Hello,

My name is [REDACTED]. I am conducting research on Milk Allergy. I am interested in an article published in this field in Annals of allergy, asthma & immunology, Volume 73, Issue 3, which is not available at [annallergy.org](http://annallergy.org).

Ann Allergy. 1994 Sep;73(3):215-9.

There is another way to get this study?

Sincerely, [REDACTED]

FW: Re: Request article Caixa de entrada x

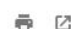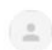

**annallergy** <[annallergy@umc.edu](mailto:annallergy@umc.edu)>  
para mim ▾

18 de nov. de 2020 11:47 ☆ ↩ ⋮

🌐 Inglês ▾ > português ▾ Traduzir mensagem

[Desativar para: inglês x](#)

[REDACTED]  
I checked with the person who handles the website and she indicates in her email below that the manuscript you are requesting is not available online.

Kind regards,  
Liz Marshall  
Managing Editor

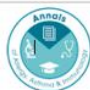

**Elizabeth M. Marshall, RN**  
Managing Editor  
[annallergy@umc.edu](mailto:annallergy@umc.edu)

---

**From:** [REDACTED]  
**Date:** Wednesday, November 18, 2020 at 8:14 AM  
**To:** "[annallergy@umc.edu](mailto:annallergy@umc.edu)" <[annallergy@umc.edu](mailto:annallergy@umc.edu)>  
**Subject:** [EXTERNAL]Re: Request article
